# Supplementary material
Source: PubMed Central journal article supplement (PMC3819137)
Supplement: NIHMS406662-supplement-1.pdf [file NIHMS406662-supplement-1.pdf]

## Supplementary Figure 1.

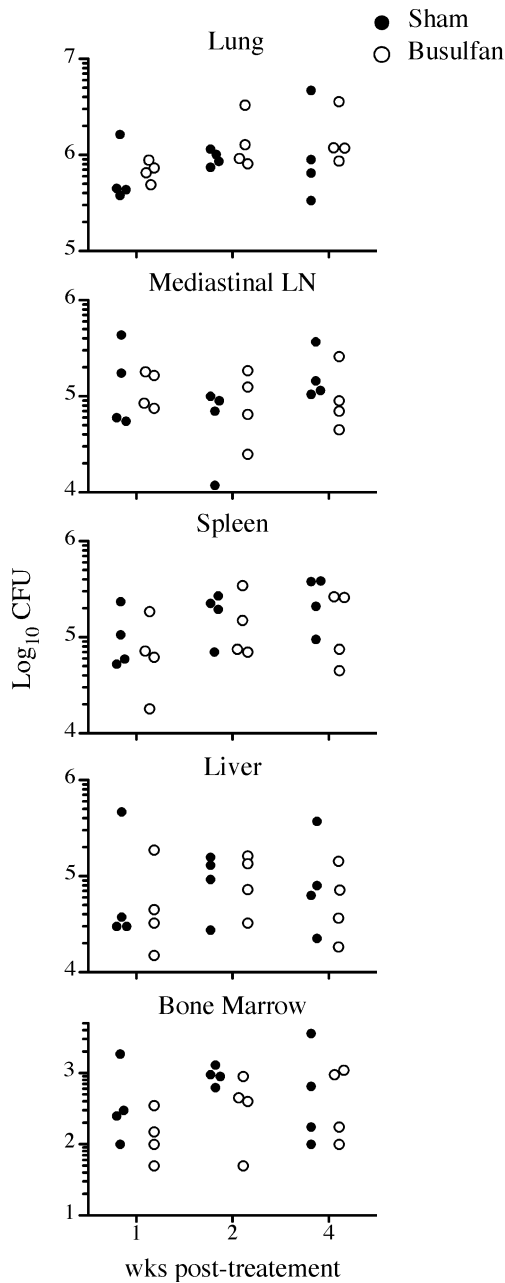

**Supplementary Figure 1. Busulfan treatment does not affect bacterial colonization.** Mice were administered 0.6 mg of busulfan or PBS (sham treated), via the peritoneal route, on day 60 post-infection. Bacteria colonization of the lung, MLN, spleen, liver, and bone marrow were determined 1, 2, and 4 weeks after treatment. The data are representative of two experiments of similar design, wherein five mice were used per group.
