# Supplementary material
Source: PubMed Central journal article supplement (PMC3819137)
Supplement: NIHMS406662-supplement-3.pdf [file NIHMS406662-supplement-3.pdf]

### Supplementary Figure 3.

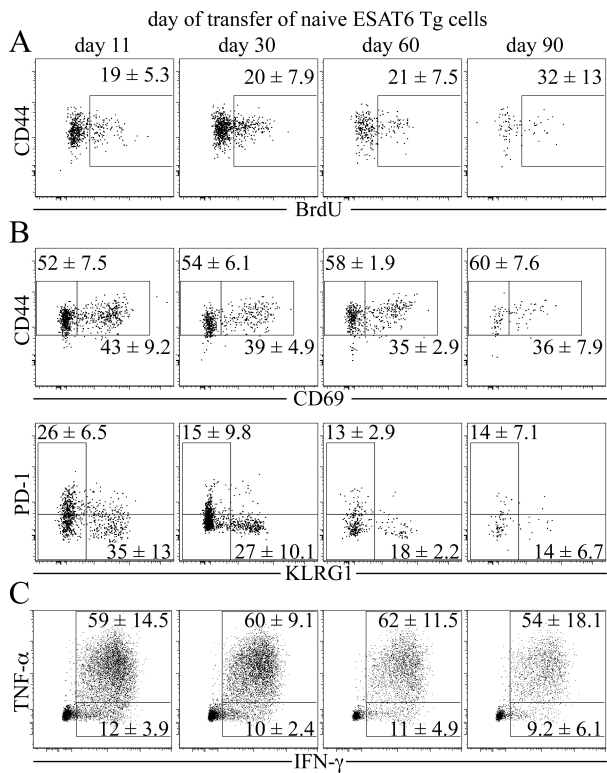

**Supplementary Figure 3. Naïve T cell priming during Mtb infection.** Naïve ESAT6 transgenic T cells ( $2 \times 10^5$ ) were injected intravenously into CD45-congenic mice that had been aerosol-infected 11, 30, 60, or 90 days prior. The proliferation, phenotype, and cytokine potential of transgenic donor cells in the lung were determined on day 10 post-transfer. (A) BrdU was administered to mice on day 9 post-transfer and BrdU incorporation in ESAT6 transgenic T cells was measured 1 day later. (B) The dot plots are representative of the CD69, CD44, PD-1 and KLRG1 expression of ESAT6 transgenic T cells isolated from lungs of mice on day 10 post-transfer. (C) Dot plots indicate the frequency of IFN $\gamma$ - and TNF $\alpha$ -producing ESAT6 transgenic T cell detected on day 10 post-transfer. Frequencies indicate the average  $\pm$  standard deviation for 5 mice and the data are representative of two experiments of similar design.
